# Supplementary material
Source: PubMed Central journal article supplement (PMC6378673)
Supplement: ml8b00445_si_001.pdf [file ml8b00445_si_001.pdf]

# Evolution of Small Molecule Kinase Drugs

Helen Lightfoot,<sup>†</sup> Frederick Goldberg,<sup>††</sup> Joerg Sedelmeier<sup>‡</sup>

## ErbB

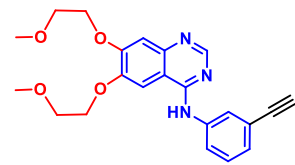

erlotinib (INN 2002)

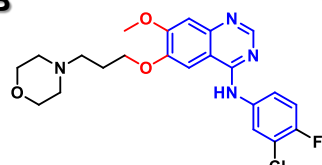

gefitinib (INN 2002)

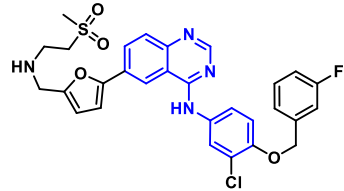

lapatinib (INN 2003)

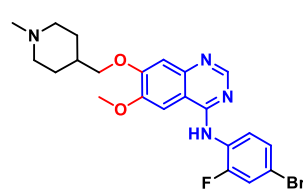

vandetanib\* (INN 2004)

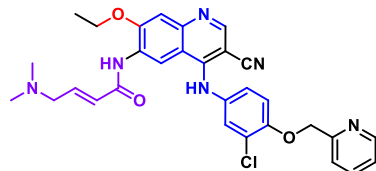

neratinib (INN 2007)

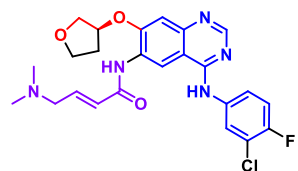

afatinib (INN 2010)

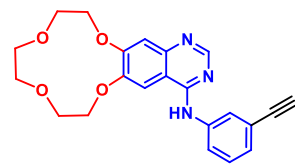

icotinib (INN 2011)

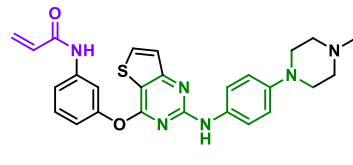

olmutinib (INN 2015)

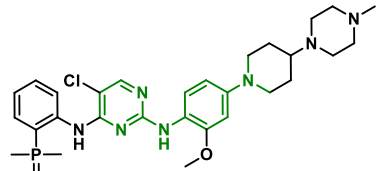

brigatinib\* (INN 2016)

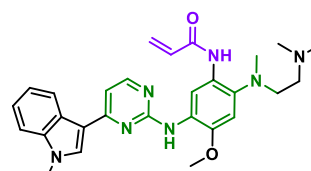

osimertinib (INN 2016)

## PI3Kδ

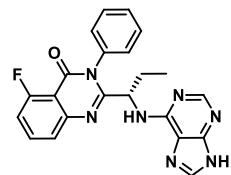

idelalisib (INN 2012)

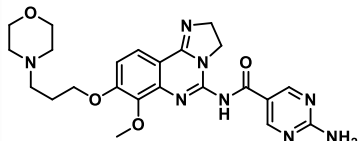

copanlisib (INN 2012)

## JAK

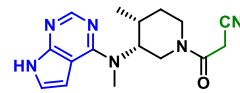

tofacitinib (INN 2011)

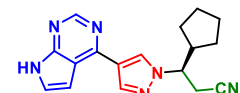

ruxolitinib (INN 2011)

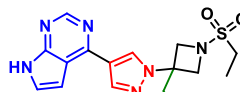

baricitinib (INN 2013)

## BCR-Abl

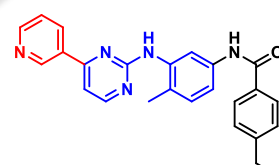

imatinib\* (INN 2001)

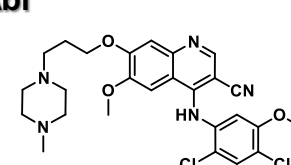

bosutinib\* (INN 2005)

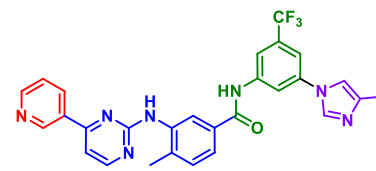

nilotinib\* (INN 2005)

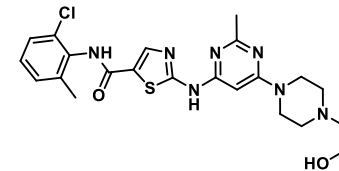

dasatinib\* (INN 2005)

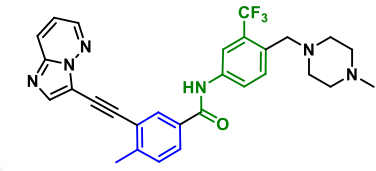

ponatinib\* (INN 2010)

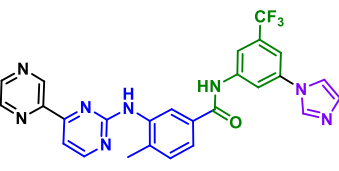

radotinib\* (INN 2010)

## ALK

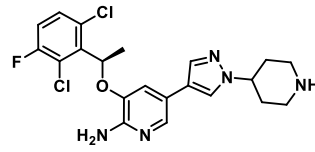

crizotinib\* (INN 2011)

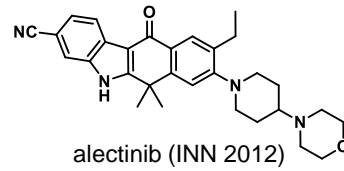

alectinib (INN 2012)

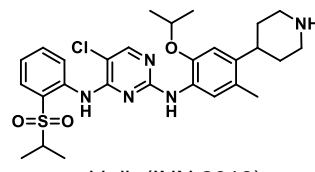

ceritinib (INN 2013)

## CDK

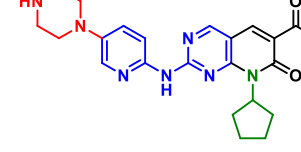

palbociclib (INN 2013)

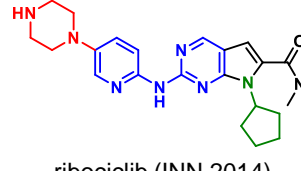

ribociclib (INN 2014)

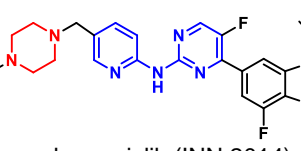

abemaciclib (INN 2014)

## VEGFR

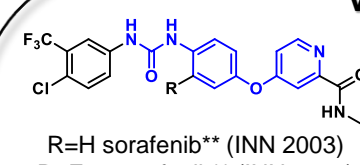

R=H sorafenib\*\* (INN 2003)  
R=F regorafenib\*\* (INN 2009)

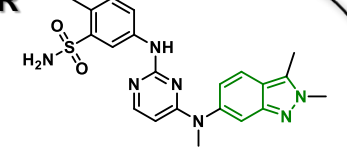

pazopanib\* (INN 2005)

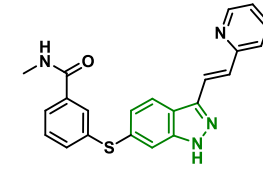

axitinib\* (INN 2005)

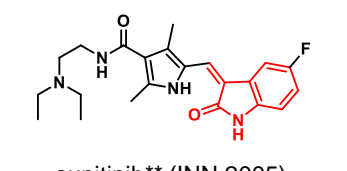

sunitinib\*\* (INN 2005)

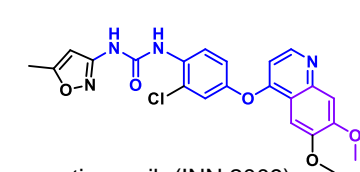

tivozanib (INN 2009)

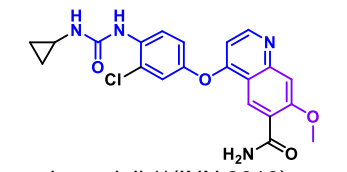

lenvatinib\*\* (INN 2010)

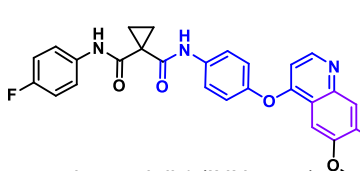

cabozantinib\* (INN 2011)

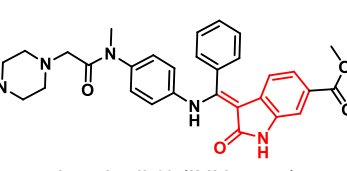

nintedanib\*\* (INN 2011)

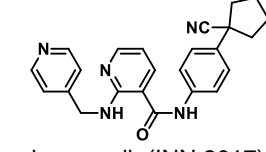

rivoceranib (INN 2017)

## BTK

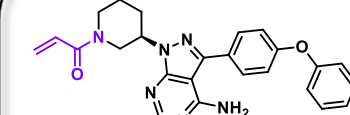

ibrutinib (INN 2013)

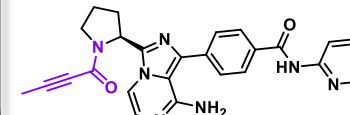

acalabrutinib (INN 2016)

## SYK

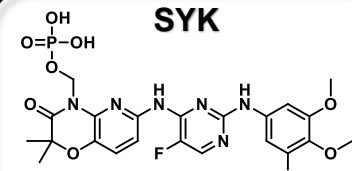

fostamatinib (INN 2009)

## BRAF

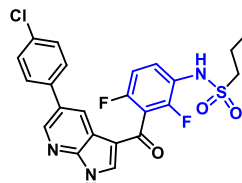

vemurafenib (INN 2011)

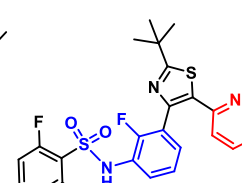

dabrafenib (INN 2012)

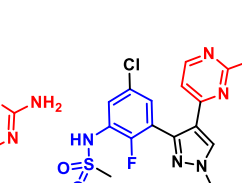

encorafenib (INN 2013)

## MAP2K/MEK

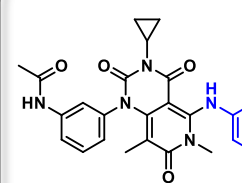

trametinib (INN 2011)

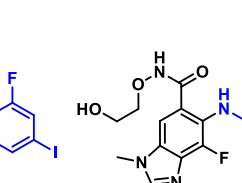

binimetinib (INN 2013)

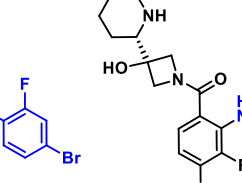

cobimetinib (INN 2013)
